# Supplementary material
Source: PubMed Central journal article supplement (PMC4371831)
Supplement: supp_tpc.114.129171_tpc129171_Supplemental.pdf [file supp_tpc.114.129171_tpc129171_Supplemental.pdf]

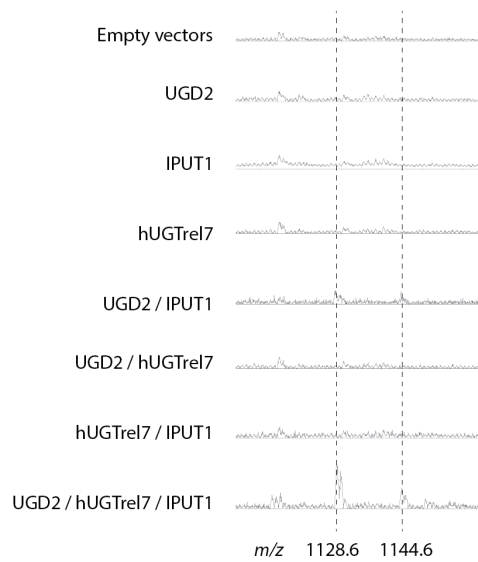

**Supplemental Figure 1.** Production of GlcA-IPC in *sur1* $\Delta$  yeast expressing UGD2, hUGTrel7, and IPUT1. All yeast contain the  $\Delta$ *sur1* knockout mutation and vectors with Leu, His, and Ura markers. Vectors are either empty (contain a small non-coding DNA fragment in the Gateway site) or include UGD2, hUGTrel7, and/or IPUT1 cDNA. Mass spectrum of lipids from each yeast transformant showing GlcA-IPC peaks at m/z 1128.6 (t18:0/h26:0 ceramide) and 1144.6 (t18:0/d26:0 ceramide).

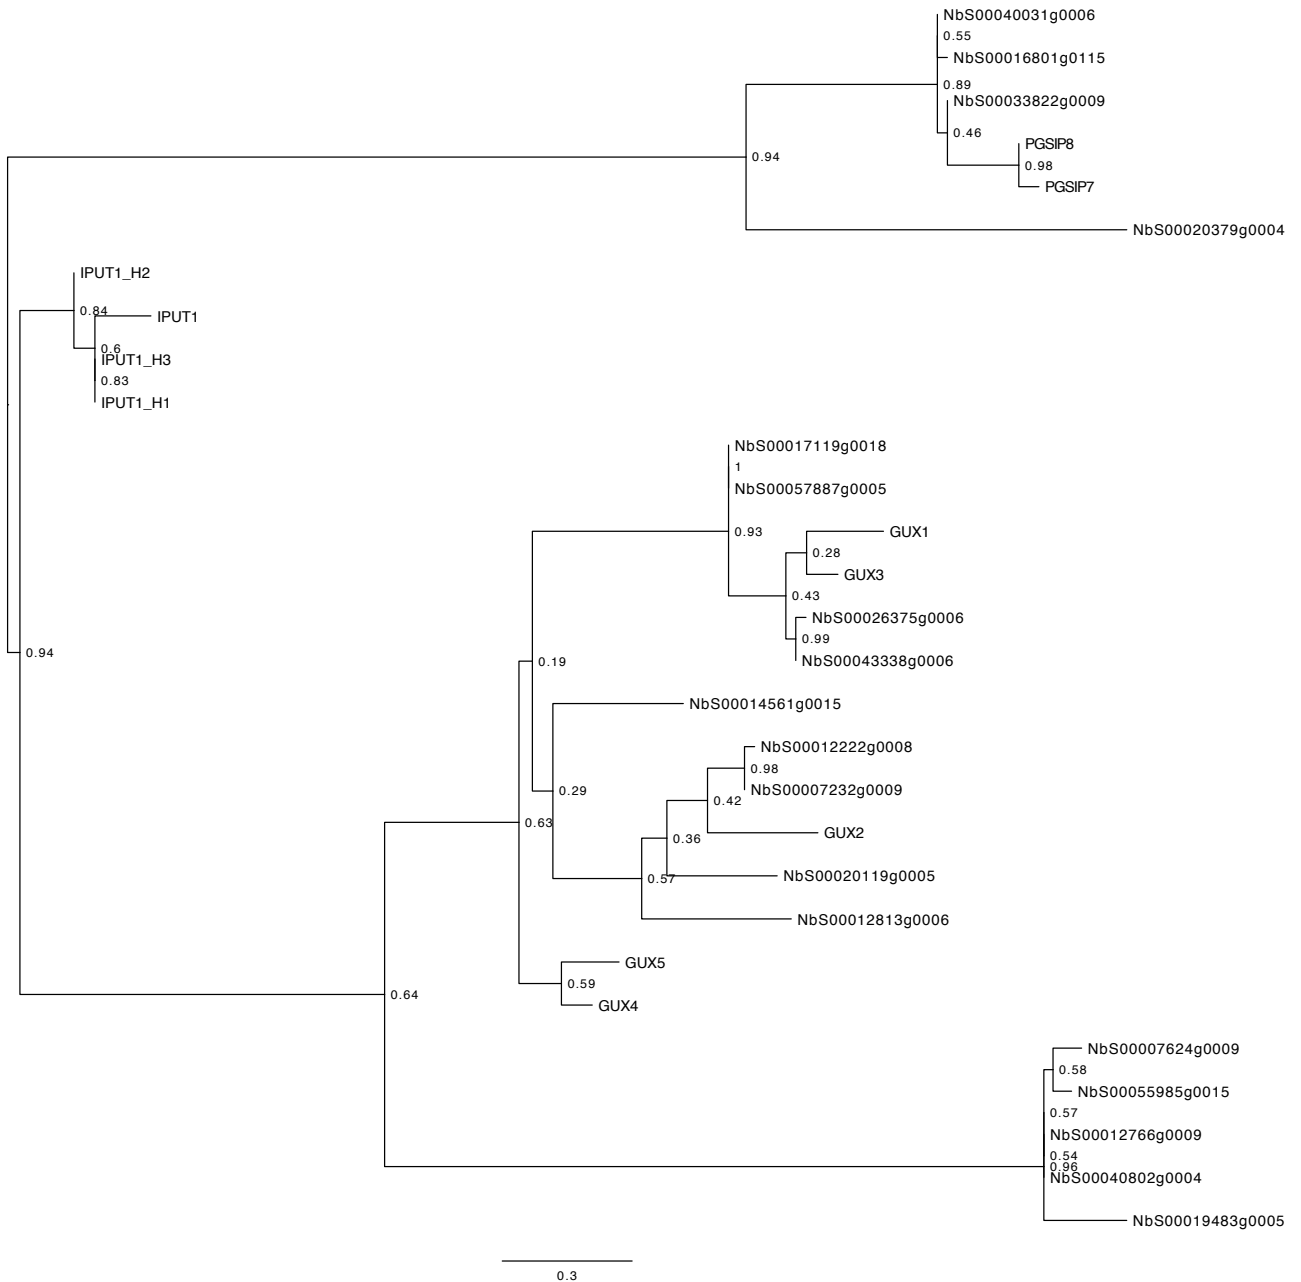

**Supplemental Figure 2.** Homologs of GUX, PGSIP, and IPUT1 proteins in *N. benthamiana*. In order to silence homologs of IPUT1, we identified members of the GUX/PGSIP/IPUT1 clade in *N. benthamiana*. IPUT1 has three closely related members in *N. benthamiana*. Bootstrap values are shown at nodes. Bar represents number of substitutions per 100 amino acids. Alignments used to generate the phylogeny can be found in Supplemental Dataset 1 online.

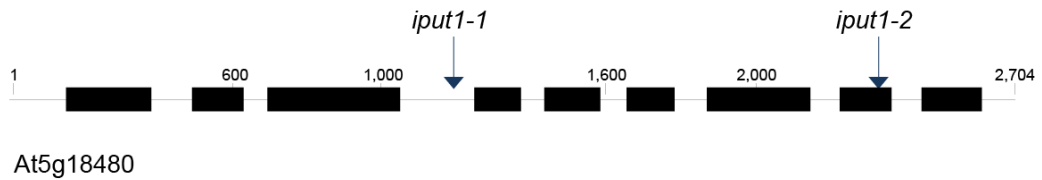

**Supplemental Figure 3.** Schematic representation of the At5g18480 gene locus without promoter region. Black boxes represent exons; line represents 5' and 3'UTR and introns. Numbers indicate the bp position starting from the 5'UTR. Arrows indicate T-DNA insertion sites in the alleles *iput1-1* (SALK\_131322) and *iput1-2* (GK\_856G03).

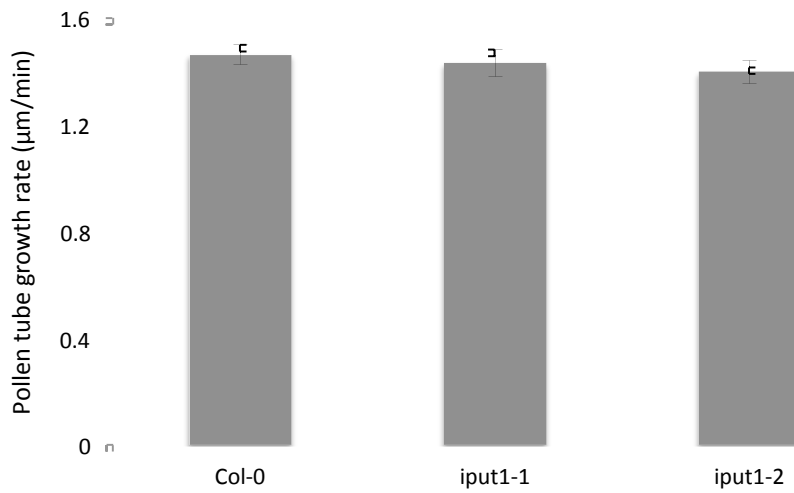

**Supplemental Figure 4.** Pollen tube growth rates of pollen from *iput1-1/+* and *iput1-2/+* Arabidopsis plants. Pollen was collected from 10 plants of each genotype. Values shown are mean  $\pm$  SE,  $n = 318$ .

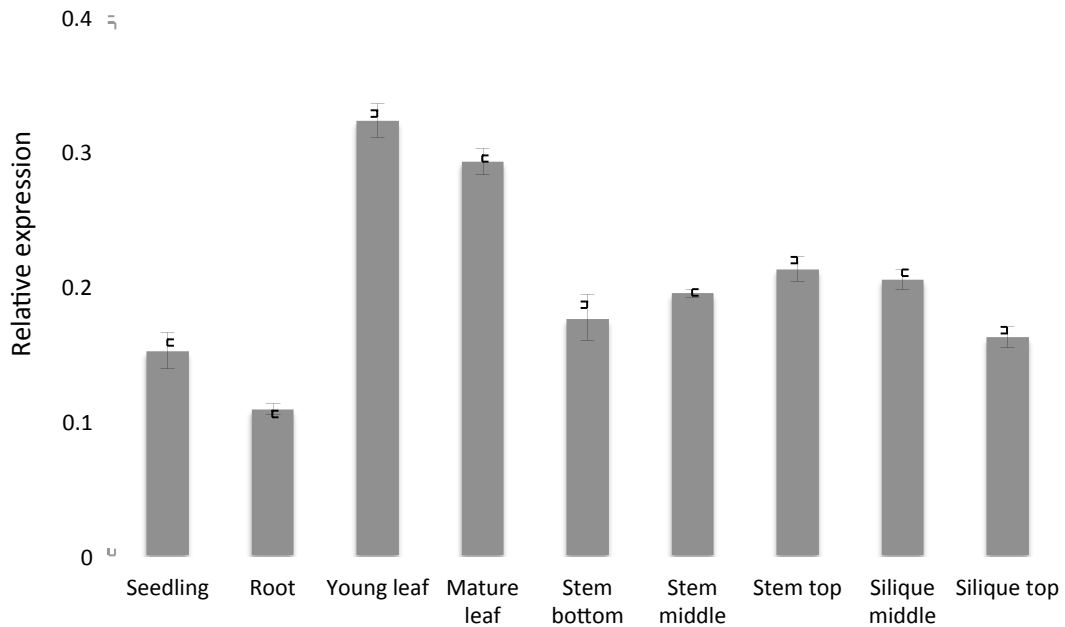

**Supplemental Figure 5.** Expression of *IPUT1* throughout Arabidopsis. Quantitative, real-time PCR showing expression of *IPUT1* cDNA in Arabidopsis tissues. Values are expressed as the ratio to geometric mean of three reference genes (*UBI*, *ACT2* and *EF1 $\alpha$* ) and are the mean  $\pm$  SE for three technical replicates.

:"

| <b>Primer sequence (forward/reverse)</b>                                  | <b>Purpose</b>                                       |
|---------------------------------------------------------------------------|------------------------------------------------------|
| CAGGCTTCACCATGGCAAACCTCTCCCCTGCTCC/<br>AAAGCTGGGTCCAAGTTATGGCCGGGAAGTGATG | Gene-specific primers for cloning<br>GUX1            |
| CAGGCTTCACCATGGTGAGACTCAAGACGAGTCT/<br>AAAGCTGGGTACAGAGGAAACATAGGGAATTTG  | Gene-specific primers for cloning<br>IPUT1           |
| GGGGACAAGTTTGTACAACCCAGCAGGCTTCACC/<br>GGGGACCACTTTGTACAAGAAAGCTGGGTC     | Gateway attB-specific primers                        |
| GATGAATTCTTGCTTGGGGTTAGGG/<br>CATTCTAGAAGTCTCTCAGAATGTTTTAAATTT           | Cloning N.benthamiana IPUT1<br>fragment for VIGS     |
| GCGAGCAGGTGGGTCTTGT/ CCGCGAGGTGCTCTGAAG                                   | qPCR primers for Arabidopsis IPUT1                   |
| GGCCTTGATAATCCCTGATGAATAAG/<br>AAAGAGATAACAGGAACGGAAACATAGT               | qPCR primers for Arabidopsis<br>UBQ10                |
| TGAGCACGCTCTTCTTGCTTTCA/ GGTGGTGGCATCCATCTTGTTACA                         | qPCR primers for Arabidopsis EF1a                    |
| CTTGACCAAGCAGCATGAA/ CCGATCCAGACACTGTACTTCCTT                             | qPCR primers for Arabidopsis ACT2                    |
| ATTTGCACTTGGTGTATCATTGG/ ATGATTGTTGCCGCTGATGAC                            | qPCR primers for N. benthamiana<br>IPUT1-H1          |
| AAAAATCCTAGAGATGAACTTCTTGT/ TCACACAATGACCGGGTCTTT                         | qPCR primers for N. benthamiana<br>IPUT1-H2          |
| TGTCATGAAGGATGCCAAAATAAG/GATTAGGGATGGCATTCTTGC                            | qPCR primers for N. benthamiana<br>IPUT1-H3          |
| CACTGGTCACTTGATCTACAAG/GTCAATAATCAGGACAGCACAG                             | qPCR primers for N. benthamiana<br>EF1a              |
| TTGAGACTTTTAATACCCAGC/AACATGTAACCACGCTCGGTAA                              | qPCR primers for N. benthamiana<br>ACT2              |
| GCCGATTACAACATCCAGAAGG/TGAAGTACAGCGAGCTTAACC                              | qPCR primers for N. benthamiana<br>UBI3              |
| TGATTATAAGAAAGTTGTG/ TCATCAACCATCCAATTAC                                  | Amplifying IPUT1 from pollen                         |
| AGCTCCCTTTCCAGAGGCTA/ TCCAAGTCTCTACACCCAAA                                | Amplifying Histone H3 from pollen                    |
| TCTTCTCCTGCCCTCGTTTC/ GGGAATTTGATCTCGTCGTGTC                              | Gene-specific primers for<br>genotyping iput1-1      |
| TTTGGTTTTCGAGAAAATTGAGA/ CTCATCGGAGAGGTTGAGTGA<br>ATATTGACCATCATACTCATTGC | Gene-specific primers for<br>genotyping iput1-2      |
| GCCTTTTCAGAAATGGATAAATAGCCTTGCTTCC                                        | GABI-KAT T-DNA left border<br>SAIL T-DNA left border |

**Supplemental Table 1.** Primer sequences.

| $m/z$ | Long-chain base | Fatty acid | [M+H] (m/z) | Product ion (m/z) | Dwell time (ms) | DP (V) | CE (V) |
|-------|-----------------|------------|-------------|-------------------|-----------------|--------|--------|
| t18:0 |                 | h16:0      | 814.6       | 554.5             | 30              | 45     | 45     |
| t18:0 |                 | h18:0      | 842.6       | 582.5             | 30              | 45     | 45     |
| t18:0 |                 | h20:0      | 870.7       | 610.6             | 30              | 45     | 45     |
| t18:0 |                 | h20:1      | 868.7       | 608.6             | 30              | 45     | 45     |
| t18:0 |                 | h22:0      | 898.7       | 638.6             | 30              | 45     | 45     |
| t18:0 |                 | h22:1      | 896.7       | 636.6             | 30              | 45     | 45     |
| t18:0 |                 | h24:0      | 926.7       | 666.6             | 30              | 45     | 45     |
| t18:0 |                 | h24:1      | 924.7       | 664.6             | 30              | 45     | 45     |
| t18:0 |                 | h26:0      | 954.8       | 694.7             | 30              | 45     | 45     |
| t18:0 |                 | h26:1      | 952.8       | 692.7             | 30              | 45     | 45     |
| t18:1 |                 | h16:0      | 812.6       | 552.5             | 30              | 45     | 45     |
| t18:1 |                 | h18:0      | 840.6       | 580.5             | 30              | 45     | 45     |
| t18:1 |                 | h20:0      | 868.7       | 608.6             | 30              | 45     | 45     |
| t18:1 |                 | h20:1      | 866.7       | 606.6             | 30              | 45     | 45     |
| t18:1 |                 | h22:0      | 896.7       | 636.6             | 30              | 45     | 45     |
| t18:1 |                 | h22:1      | 894.7       | 634.6             | 30              | 45     | 45     |
| t18:1 |                 | h24:0      | 924.7       | 664.6             | 30              | 45     | 45     |
| t18:1 |                 | h24:1      | 922.7       | 662.6             | 30              | 45     | 45     |
| t18:1 |                 | h26:0      | 952.8       | 692.7             | 30              | 45     | 45     |
| t18:1 |                 | h26:1      | 950.8       | 690.7             | 30              | 45     | 45     |
| d18:0 |                 | h16:0      | 798.6       | 538.5             | 30              | 45     | 45     |
| d18:0 |                 | h18:0      | 826.7       | 566.6             | 30              | 45     | 45     |
| d18:0 |                 | h20:0      | 854.7       | 594.6             | 30              | 45     | 45     |
| d18:0 |                 | h20:1      | 852.7       | 592.6             | 30              | 45     | 45     |
| d18:0 |                 | h22:0      | 882.7       | 622.6             | 30              | 45     | 45     |
| d18:0 |                 | h22:1      | 880.7       | 620.7             | 30              | 45     | 45     |
| d18:0 |                 | h24:0      | 910.7       | 650.6             | 30              | 45     | 45     |
| d18:0 |                 | h24:1      | 908.8       | 648.6             | 30              | 45     | 45     |
| d18:0 |                 | h26:0      | 938.8       | 678.7             | 30              | 45     | 45     |
| d18:0 |                 | h26:1      | 936.8       | 676.7             | 30              | 45     | 45     |
| d18:1 |                 | h16:0      | 796.6       | 536.5             | 30              | 45     | 45     |
| d18:1 |                 | h18:0      | 824.6       | 564.5             | 30              | 45     | 45     |
| d18:1 |                 | h20:0      | 852.7       | 592.6             | 30              | 45     | 45     |
| d18:1 |                 | h20:1      | 850.7       | 590.6             | 30              | 45     | 45     |
| d18:1 |                 | h22:0      | 880.7       | 620.6             | 30              | 45     | 45     |
| d18:1 |                 | h22:1      | 878.7       | 618.6             | 30              | 45     | 45     |
| d18:1 |                 | h24:0      | 908.7       | 648.6             | 30              | 45     | 45     |
| d18:1 |                 | h24:1      | 906.7       | 646.6             | 30              | 45     | 45     |
| d18:1 |                 | h26:0      | 936.7       | 676.6             | 30              | 45     | 45     |
| d18:1 |                 | h26:1      | 934.7       | 674.6             | 30              | 45     | 45     |
| d18:2 |                 | h16:0      | 794.8       | 534.7             | 30              | 45     | 45     |
| d18:2 |                 | h18:0      | 822.8       | 562.7             | 30              | 45     | 45     |
| d18:2 |                 | h20:0      | 850.8       | 590.7             | 30              | 45     | 45     |
| d18:2 |                 | h20:1      | 848.8       | 588.7             | 30              | 45     | 45     |
| d18:2 |                 | h22:0      | 878.7       | 618.7             | 30              | 45     | 45     |
| d18:2 |                 | h22:1      | 876.7       | 616.7             | 30              | 45     | 45     |
| d18:2 |                 | h24:0      | 906.7       | 646.7             | 30              | 45     | 45     |
| d18:2 |                 | h24:1      | 904.7       | 644.7             | 30              | 45     | 45     |
| d18:2 |                 | h26:0      | 934.7       | 674.7             | 30              | 45     | 45     |
| d18:2 |                 | h26:1      | 932.7       | 672.7             | 30              | 45     | 45     |

**Supplemental Table 2.** Parameters for MRM detection of IPCs in positive ion mode. Masses for precursor (M+H, Q1) and product ions (Q3) were based on observed [M+H] ions detected by precursor ion scans for the t18:1/h24:0 hydroxyceramide backbone ( $m/z$  664.6) and known fragmentation patterns. MRMs were calculated based on known IPC structures. Declustering potential (DP) and collision energy (CE) values were chosen based on average values used for GlcOH-GlcA-IPCs.
